# Supplementary material for: Divergence in Morris Water Maze-Based Cognitive Performance under Chronic Stress Is Associated with the Hippocampal Whole Transcriptomic Modification in Mice
Source: Front Mol Neurosci. 2017 Aug 30;10:275. doi: 10.3389/fnmol.2017.00275 (PMC5582454; doi:10.3389/fnmol.2017.00275)
Supplement: Supplementary Table S7 — Results of the best subset regression model analyses. [file Table7.XLSX]

## Sheet: Sheet1
	Variable	Symbol		Model #	Variable	Cp	Rsqr	Adj Rsqr	MSerr	A	B	C	D	E	F	G	H	I	J	K	L	M	N	O	P
	ENSMUSG00000026554	A		1	1	93.481	0.683	0.663	30.204	*
	ENSMUSG00000026553	B		2	2	35.242	0.861	0.842	14.161	*										*
	ENSMUSG00000085373	C		3	3	13.094	0.932	0.917	7.417			*					*								*
	ENSMUSG00000070527	D		4	4	5.404	0.96	0.948	4.636			*			*		*								*
	ENSMUSG00000062729	E		5	5	4.215	0.97	0.957	3.827	*		*				*	*						*
	ENSMUSG00000091748	F		6	6	2.816	0.98	0.969	2.786	*		*		*		*	*						*
	ENSMUSG00000070504	G		7	7	4.062	0.982	0.97	2.726	*		*		*		*	*		*				*
	ENSMUSG00000038496	H		8	8	5.429	0.984	0.97	2.712	*		*		*	*	*	*						*		*
	ENSMUSG00000051617	I		9	9	6.965	0.985	0.969	2.791	*		*			*		*		*	*	*		*	*
	ENSMUSG00000003458	J		10	10	8.644	0.986	0.967	2.983	*		*			*		*		*	*	*		*	*	*
	ENSMUSG00000089901	K		11	11	10.331	0.987	0.964	3.245	*	*	*	*	*	*	*	*	*						*	*
	ENSMUSG00000037872	L		12	12	12.183	0.988	0.958	3.761	*	*	*	*	*	*	*	*	*			*			*	*
	ENSMUSG00000028629	M		13	13	13.401	0.99	0.957	3.823	*	*	*	*	*	*		*	*		*		*	*	*	*
	ENSMUSG00000005677	N		14	14	15.179	0.991	0.947	4.764	*	*	*	*	*	*		*	*		*	*	*	*	*	*
	ENSMUSG00000013997	O		15	15	15.174	0.997	0.971	2.64	*	*	*	*	*	*		*	*	*	*	*	*	*	*	*
	ENSMUSG00000007379	P		16	16	17	0.997	0.95	4.496	*	*	*	*	*	*	*	*	*	*	*	*	*	*	*	*
Model #	Variable	Coef.	Std. Error	t	P	VIF	R squared
1	Constant	-39.665	11.15	-3.558	0.003	0	0.683
	ENSMUSG00000026554	0.0214	0.00364	5.872	<0.001	1
2	Constant	-40.215	7.635	-5.267	<0.001	0	0.861
	ENSMUSG00000026554	0.0173	0.00266	6.503	<0.001	1.139
	ENSMUSG00000089901	0.177	0.0404	4.373	<0.001	1.139
3	Constant	36.517	6.426	5.683	<0.001	0	0.932
	ENSMUSG00000085373	0.717	0.129	5.558	<0.001	1.308
	ENSMUSG00000038496	-0.442	0.0618	-7.145	<0.001	1.077
	ENSMUSG00000007379	-0.488	0.108	-4.536	<0.001	1.294
4	Constant	24.965	6.325	3.947	0.002	0	0.96
	ENSMUSG00000085373	0.701	0.102	6.864	<0.001	1.312
	ENSMUSG00000091748	0.483	0.157	3.066	0.009	1.848
	ENSMUSG00000038496	-0.33	0.0611	-5.398	<0.001	1.68
	ENSMUSG00000007379	-0.416	0.0881	-4.723	<0.001	1.391
5	Constant	-39.86	10.211	-3.904	0.002	0	0.97
	ENSMUSG00000026554	0.0213	0.00311	6.847	<0.001	5.782 <
	ENSMUSG00000085373	0.877	0.0977	8.974	<0.001	1.452
	ENSMUSG00000070504	0.496	0.195	2.55	0.025	4.001 <
	ENSMUSG00000038496	-0.403	0.0562	-7.164	<0.001	1.726
	ENSMUSG00000005677	-0.603	0.151	-4.001	0.002	3.607
6	Constant	-46.946	9.223	-5.09	<0.001	0	0.98
	ENSMUSG00000026554	0.025	0.00309	8.096	<0.001	7.816 <
	ENSMUSG00000085373	0.963	0.0912	10.563	<0.001	1.738
	ENSMUSG00000062729	-0.025	0.0107	-2.342	0.039	3.483
	ENSMUSG00000070504	0.546	0.167	3.262	0.008	4.066 <
	ENSMUSG00000038496	-0.415	0.0482	-8.593	<0.001	1.744
	ENSMUSG00000005677	-0.611	0.129	-4.745	<0.001	3.609
7	Constant	-49.801	9.474	-5.256	<0.001	0	0.982
	ENSMUSG00000026554	0.0251	0.00306	8.216	<0.001	7.823 <
	ENSMUSG00000085373	0.944	0.0919	10.267	<0.001	1.805
	ENSMUSG00000062729	-0.0278	0.0108	-2.561	0.028	3.68
	ENSMUSG00000070504	0.562	0.166	3.382	0.007	4.097 <
	ENSMUSG00000038496	-0.417	0.0477	-8.725	<0.001	1.747
	ENSMUSG00000003458	0.0036	0.00322	1.115	0.291	3.413
	ENSMUSG00000005677	-0.686	0.144	-4.76	<0.001	4.630 <
8	Constant	-29.687	16.412	-1.809	0.104	0	0.984
	ENSMUSG00000026554	0.0188	0.00531	3.538	0.006	23.709 <
	ENSMUSG00000085373	0.888	0.107	8.314	<0.001	2.447
	ENSMUSG00000062729	-0.0214	0.0108	-1.986	0.078	3.657
	ENSMUSG00000091748	0.194	0.146	1.329	0.216	2.701
	ENSMUSG00000070504	0.411	0.189	2.18	0.057	5.306 <
	ENSMUSG00000038496	-0.375	0.0565	-6.639	<0.001	2.454
	ENSMUSG00000005677	-0.436	0.18	-2.429	0.038	7.228 <
	ENSMUSG00000007379	-0.123	0.112	-1.097	0.301	3.817
9	Constant	-22.985	7.078	-3.247	0.012	0	0.985
	ENSMUSG00000026554	0.013	0.0025	5.211	<0.001	5.118 <
	ENSMUSG00000085373	0.771	0.13	5.955	<0.001	3.501
	ENSMUSG00000091748	0.329	0.162	2.026	0.077	3.259
	ENSMUSG00000038496	-0.167	0.0714	-2.335	0.048	3.818
	ENSMUSG00000003458	-0.00385	0.00398	-0.968	0.361	5.067 <
	ENSMUSG00000089901	0.0724	0.0313	2.313	0.049	3.467
	ENSMUSG00000037872	0.0103	0.00358	2.883	0.02	5.503 <
	ENSMUSG00000005677	-0.378	0.164	-2.312	0.05	5.831 <
	ENSMUSG00000013997	-0.0235	0.0142	-1.654	0.137	6.931 <
10	Constant	-13.27	15.772	-0.841	0.428	0	0.986
	ENSMUSG00000026554	0.0109	0.00404	2.693	0.031	12.483 <
	ENSMUSG00000085373	0.744	0.14	5.326	0.001	3.807
	ENSMUSG00000091748	0.383	0.185	2.069	0.077	3.978
	ENSMUSG00000038496	-0.179	0.0761	-2.36	0.05	4.051 <
	ENSMUSG00000003458	-0.00436	0.00418	-1.044	0.331	5.229 <
	ENSMUSG00000089901	0.0644	0.0343	1.88	0.102	3.896
	ENSMUSG00000037872	0.00865	0.00443	1.954	0.092	7.851 <
	ENSMUSG00000005677	-0.259	0.241	-1.073	0.319	11.854 <
	ENSMUSG00000013997	-0.0222	0.0148	-1.501	0.177	7.038 <
	ENSMUSG00000007379	-0.0992	0.143	-0.695	0.509	5.660 <
